# Supplementary material for: Sympatric speciation in structureless environments
Source: PubMed Central journal article supplement (PMC4770699; doi:10.1186/s12862-016-0617-0), 2016-02-29
Supplement: 12862_2016_617_MOESM1_ESM.pdf [file 12862_2016_617_MOESM1_ESM.pdf]

1 **Supplementary Information.**

2

3 **Links to publication containing additional details on model structure.**

4 Wayne M. Getz, Richard Salter, Andrew J. Lyons, Nicolas Sippl-Swezey, 2015.

5 [Panmictic and Clonal Evolution on a Single Patchy Resource Produces Polymorphic Foraging](#)  
6 [Guilds](#) (<http://journals.plos.org/plosone/article?id=10.1371/journal.pone.0133732>)

7 Research Article | published 14 Aug | PLOS ONE | 10.1371/journal.pone.0133732.

8

9 **Running the model**

10 The model is run on the Nova Platform that can be downloaded from the Nova Software Website  
11 at <https://www.novamodeler.com/> . The software platform is free, but users need to register and  
12 obtain a license to run the model under Windows, Mac OS X, and Linux operating systems. The  
13 models itself can downloaded at <http://nature.berkeley.edu/getzlab/nova.html>.

14

15 **Additional Figures S1 and S2.**

16 **Figures S1.** Genetic structure of runs listed in Table 2 are illustrated here in terms of the  
17 parameter values of  $\alpha$  (blue),  $\delta$  (red),  $\rho$  (green) and  $m$  (black) ordered along the horizontal axis  
18 according to the final biomass achieved by individuals during generation 500 of the ecological  
19 simulation. **Panels A:** random cases. **Panels B:**  $m$ -trait mating cases.

20

21 **Fig. S1: Panels A.**

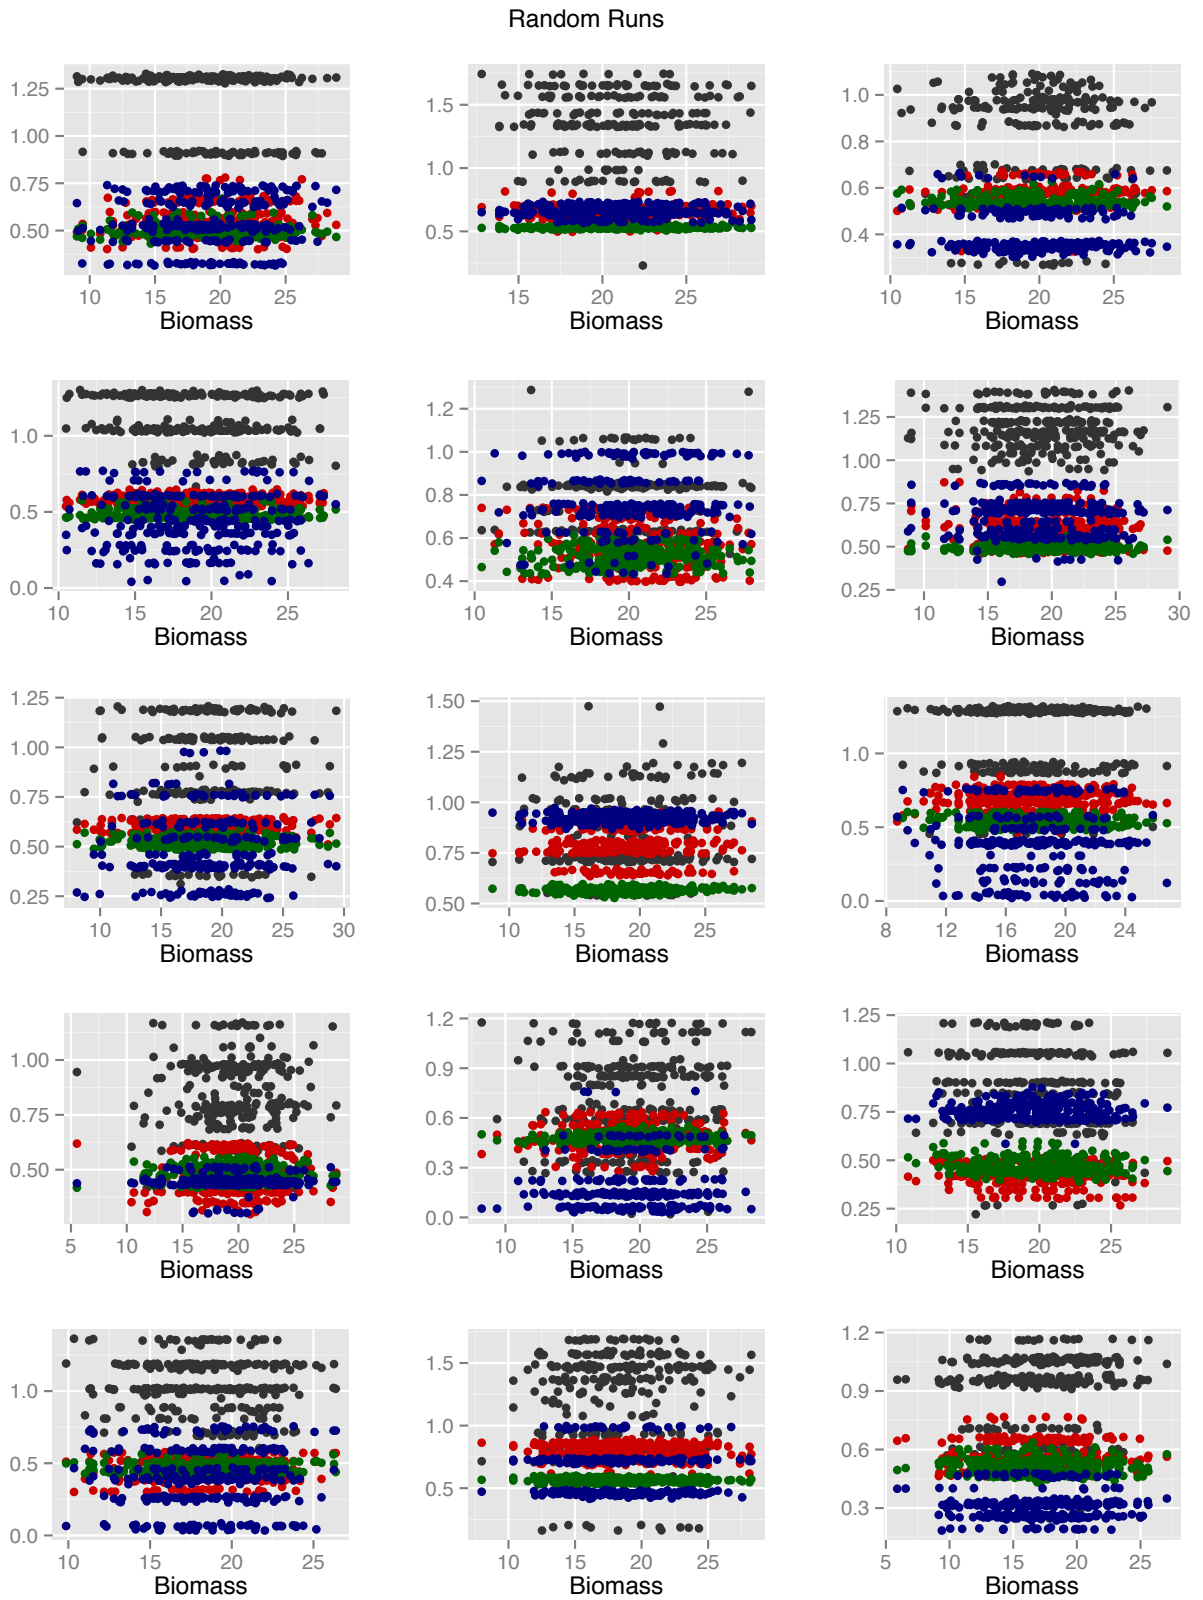

22

23

24 **Fig. S1: Panels B.**

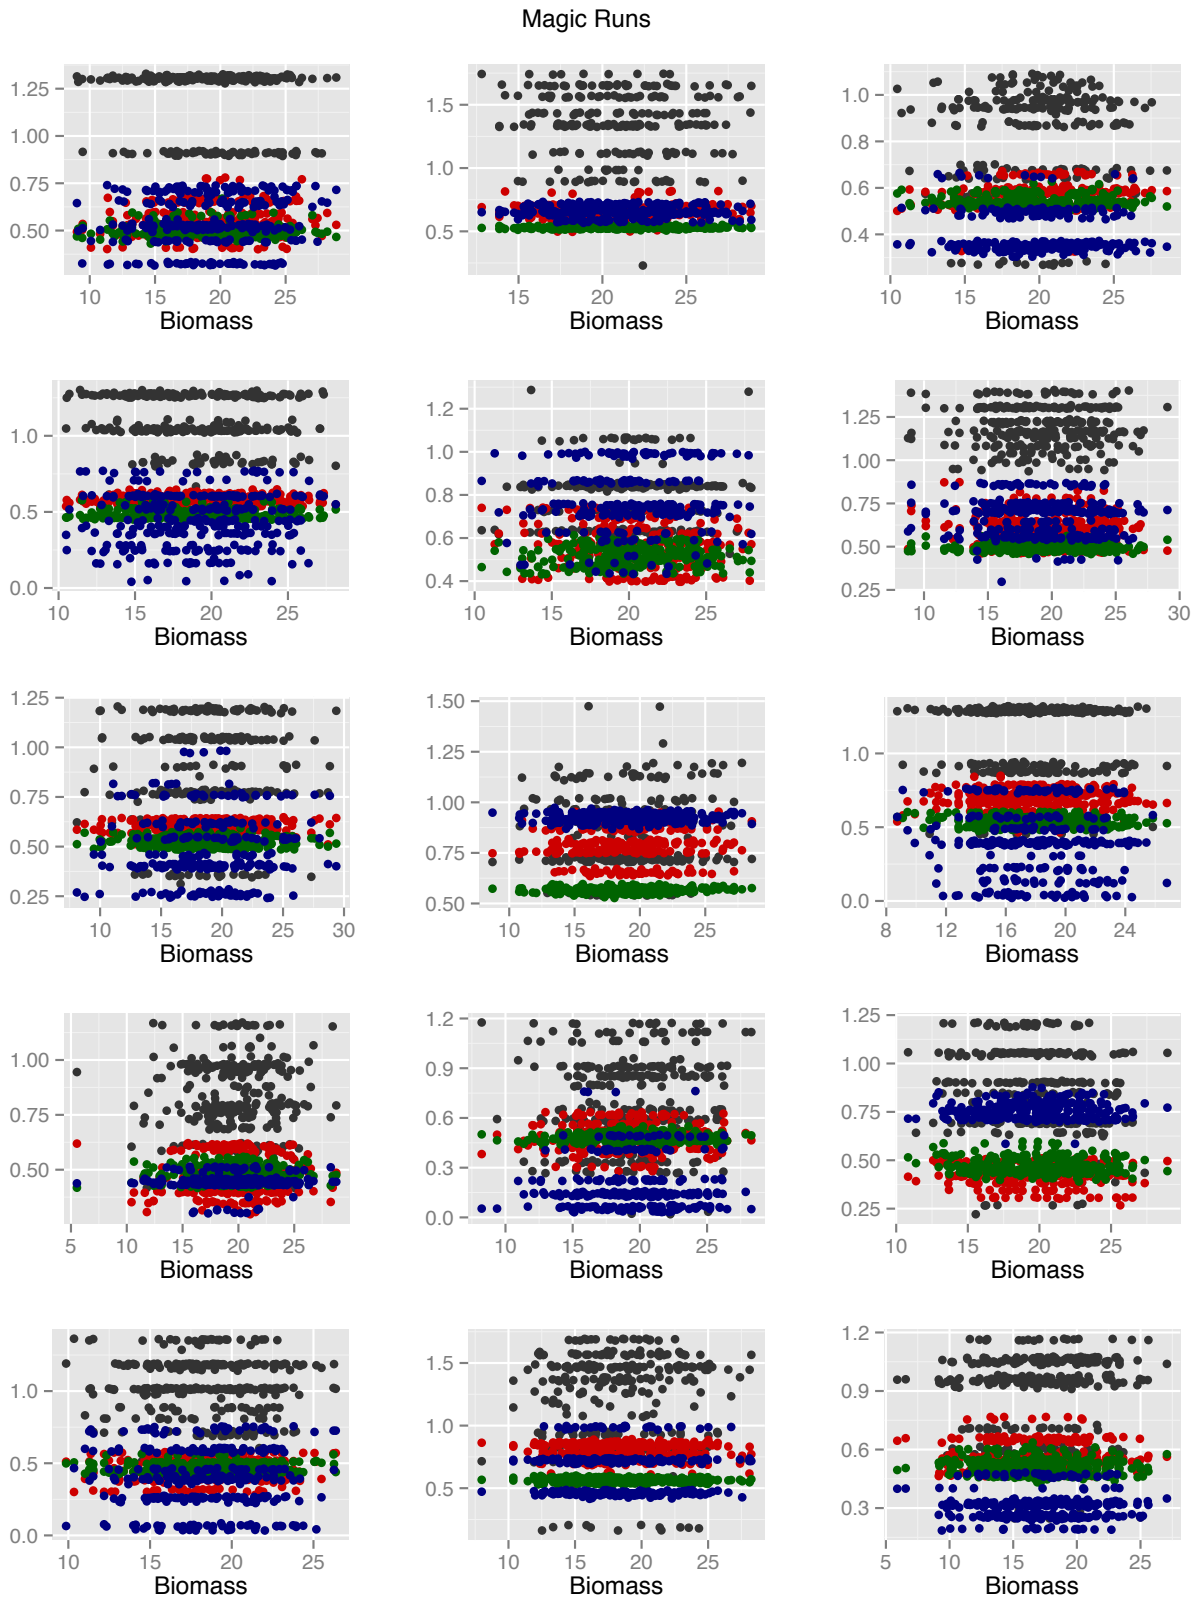

25

26

27 **Figures S2.** Dendrograms associated with the genetic structure of runs listed in Table 2 are  
28 illustrated for all 15 random (**Panels A**) and *m*-trait mating (**Panels B**) cases.

29 **Fig. S2: Panels A.**

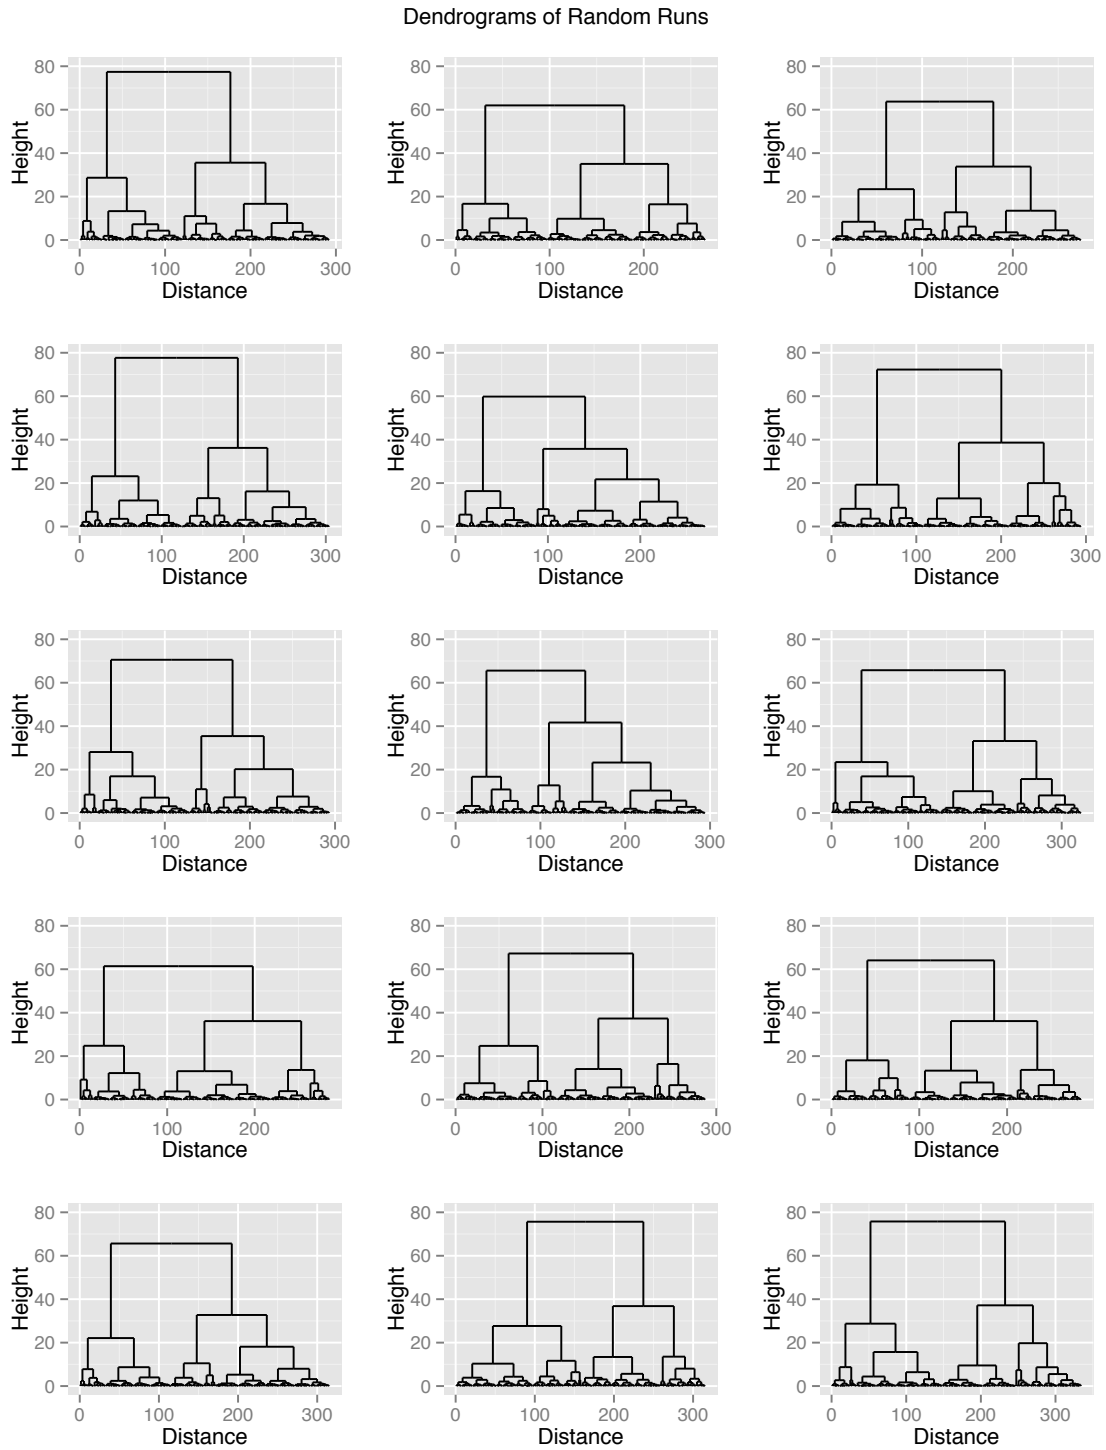

30

31 **Fig. S2: Panels B.**

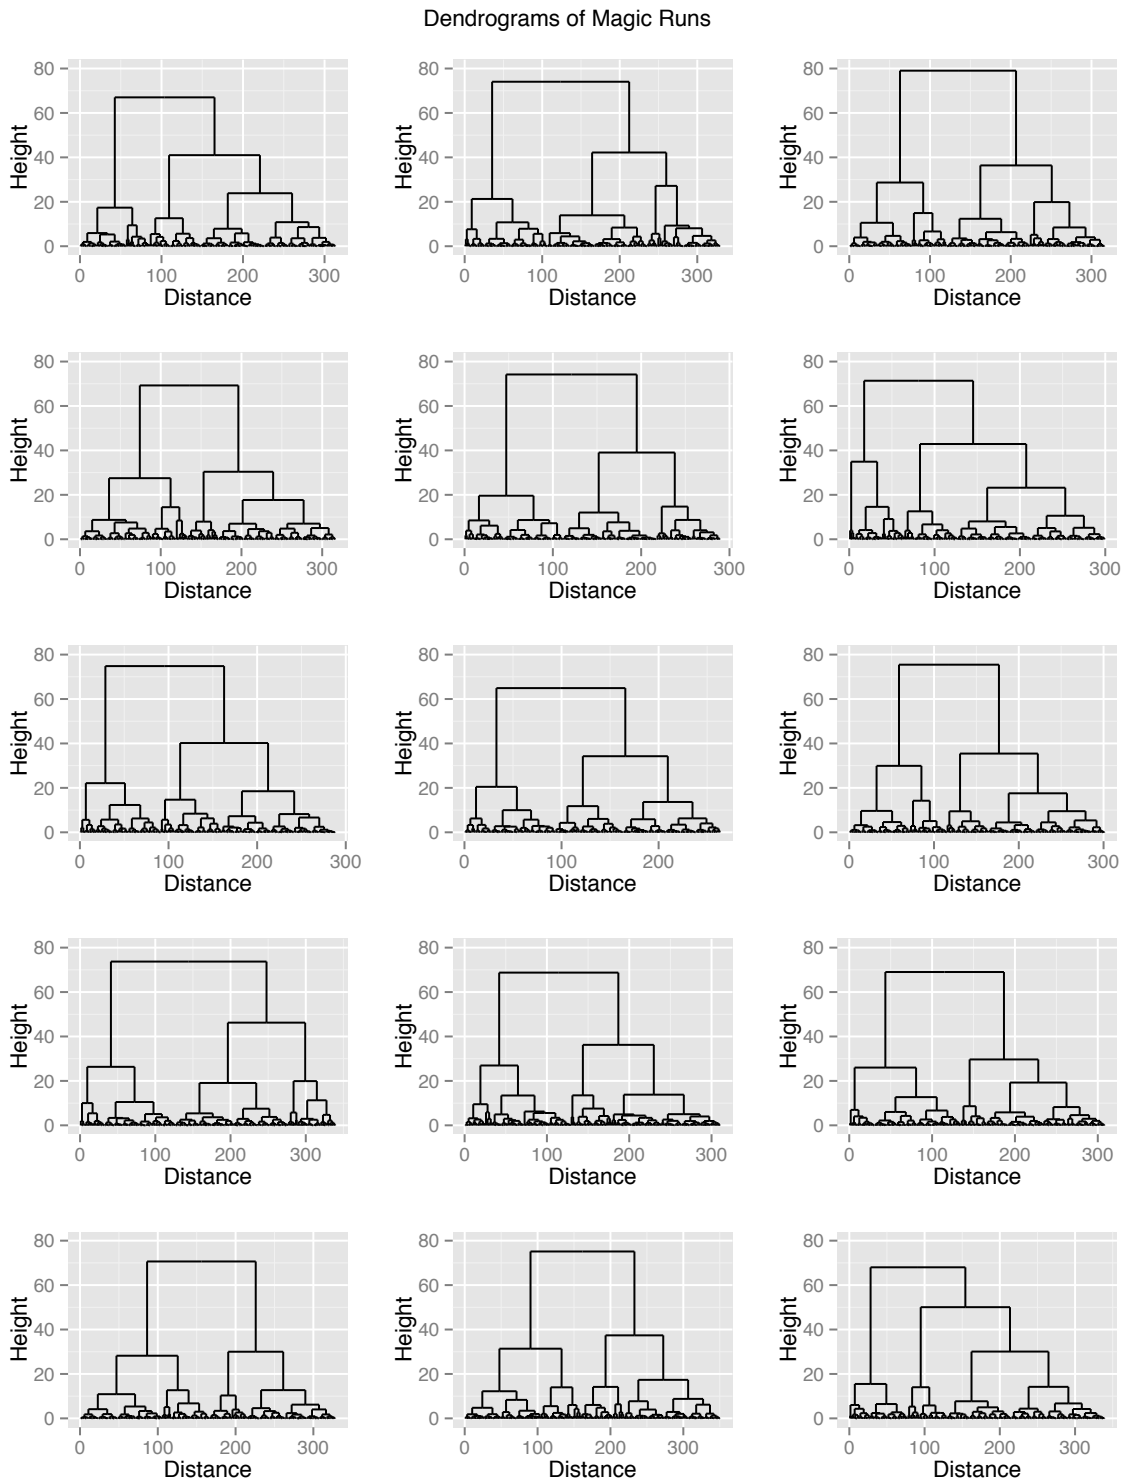

32
